# Supplementary material for: Incorporating elements of social franchising in government health services improves the quality of infant and young child feeding counselling services at commune health centres in Vietnam
Source: Oxford University Press journal article supplement (doi:10.1093/heapol/czt083), 2013-11-14
Supplement: czt083_Supplementary_Data.zip [file czt083_Supplementary_Data.zip]

## 将社会特许经营权元素植入政府医疗服务中能提高越南免疫中心里婴儿和青少年的喂养辅助服务质量

### 研究背景

尽管在发展中国家，证据已经表明社会特许经营权能够提高生育医疗服务的质量，它在营养服务领域的效果还没有被检验过。本文评估了在越南将社会特许经营权的元素加入到婴儿和青少年喂养（IYCF）辅助设施和服务领域的效果。

### 研究方法

我们将第一批社会特许经营权发放 12 个月之后收集的流程相关数据，从三个层面来比较随机指定的 Alive & Thrive 组织支持医疗设施（AT-F，n=20）与标准设施（SF，n=17）。这三个层面分别是：结构、过程和结果。这些指标能够体现设施、服务、通路、和客户感受以及使用的质量。数据统计包括了设置评估（n=32），员工调查（n=96），辅助观察（n=137），客户面谈（n=137）以及对妈妈的深访（n=48）。

### 研究结果

结构：相比于 SF，AT-F 更以利于形成一个独享的、设施良好的营养房（65.0 vs 10%）。过程：与 SF 员工相比，AT-F 的员工有更多的关于 IYCF 的知识（母乳喂养平均得分 9.9 vs 8.8，间距 0-11；补充方法平均得分 3.6 vs 3.4，间距 0-4）。AT-F 员工也明显有更好的人际交往能力（score 9.6 vs 5.1，间距 0-13），能提供更多的辅导课程。结果：社会特许经营权的总体利用很低（10%）。与有 6 到 23.9 个月大的孩子的妈妈来说（1.4%），怀孕妇女的利用率要高一些（48.9）。在 AT-F 与 SF 之间客户的满意度没有统计上的差别，单手 AT-F 的客户称赞了在孩子喂养方面 AT-F 的作用。

### 结论

通过加入社会特许经营权元素能够显著提高政府初级医疗设施中 IYCF 辅助服务的质量，特别是结构和过程中的质量。考虑到使用服务的人会随着一代一代人的增多，这个模型有潜力影响 IYCF 的实践和儿童营养。
