# Supplementary material for: Incorporating elements of social franchising in government health services improves the quality of infant and young child feeding counselling services at commune health centres in Vietnam
Source: Oxford University Press journal article supplement (doi:10.1093/heapol/czt083), 2013-11-14
Supplement: czt083_Supplementary_Data.zip [file czt083_Supplementary_Data.zip]

Archive with 6 entries (6 files):
- czt083_Chinese.pdf
- Supplementary_Table_2_Certification_criteria.docx
- czt083_Spanish.pdf
- czt083_French.pdf
- Supplementary_Figure_1.pdf
- Supplementary_Table_1_Selection_Criteria.docx
