# Supplementary material for: Incorporating elements of social franchising in government health services improves the quality of infant and young child feeding counselling services at commune health centres in Vietnam
Source: Oxford University Press journal article supplement (doi:10.1093/heapol/czt083), 2013-11-14
Supplement: czt083_Supplementary_Data.zip [file czt083_Supplementary_Data.zip › czt083_French.pdf]

# Introduire des éléments de franchise sociale dans les services de santé gouvernementaux améliore la qualité du conseil pour l'alimentation du nourrisson et du jeune enfant des centres de santé communaux au Vietnam

Accepté le 8 octobre 2013

## Contexte

Bien que la franchise sociale améliore la qualité des services de santé génésique dans les pays en développement, son effet sur les services de nutrition n'a pas encore été examiné. Cette étude a évalué les effets de l'introduction d'éléments de franchise sociale afin de déterminer la qualité des conseils concernant l'alimentation du nourrisson et du jeune enfant (ANJE) au Vietnam.

## Méthodes

Des données importantes collectées douze mois après le lancement des premières franchises furent utilisées pour comparer, de façon aléatoire, les établissements de santé mandatés et soutenus dans le cadre du projet Alive & Thrive (AT-F, n°420) avec les établissements de santé standards (ES, n°412) et ce à travers 3 aspects de la qualité de service : la structure, le processus et les résultats permettant d'évaluer la qualité des installations, les prestations de services et la perception du patient qui utilise ces services. Les données collectées comprennent l'évaluation des installations (n°432), des enquêtes auprès du personnel (n°496), les conseils prodigués (n°4137), les entretiens de sortie avec les patients (n°4137) et des enquêtes approfondies auprès des mères (n°448).

## Résultats

*Structure*: Les établissements soutenus par le projet AT-F sont plus susceptibles d'avoir des chambres individuelles bien équipées pour prodiguer des conseils nutritionnels que les ES (65% vs 10%). *Processus* : comparé aux prestataires d'ES, le personnel des AT-F a une meilleure connaissance de l'ANJE (score moyen 9,9 vs 8,8, écart 0–11 pour l'allaitement ; score moyen 3,6 vs 3,2, écart 0–4 pour l'alimentation complémentaire). Les prestataires d'AT-F ont aussi montré de meilleures aptitudes à la communication interpersonnelle (score 9,6 vs 5,1, écart 0–13) et ont reçu des sessions d'informations plus détaillées. *Résultats* : globalement l'utilisation de franchises était basse (10%). Une proportion plus importante de femmes enceintes a utilisé les services franchisés (48,9%) comparée aux femmes avec des enfants en bas âge (1,4%).

Il n'y avait aucune différence quantitative entre les AT-F et les ES en ce qui concerne la satisfaction du client, mais les personnes utilisant les franchises plébiscitent les AT-F pour les réponses apportées à tout problème nutritionnel infantile.

## Conclusion

Introduire des éléments de franchise sociale améliore de façon conséquente la qualité des conseils pour l'ANJE au sein des établissements de santé gouvernementaux primaires, et plus particulièrement pour les caractéristiques structurelles et procédurales. A condition que l'utilisation des services s'améliore par une génération de la demande, ce modèle peut potentiellement impacter les pratiques de l'ANJE et l'alimentation de l'enfant.

Mots clés : Franchise sociale, Conseil nutritionnel, Alimentation du nourrisson et du jeune enfant, Qualité des soins, Vietnam
