# Supplementary material for: Incorporating elements of social franchising in government health services improves the quality of infant and young child feeding counselling services at commune health centres in Vietnam
Source: Oxford University Press journal article supplement (doi:10.1093/heapol/czt083), 2013-11-14
Supplement: czt083_Supplementary_Data.zip [file czt083_Supplementary_Data.zip › czt083_Spanish.pdf]

# **La incorporación de elementos de franquicia social en los servicios de salud del gobierno mejora la calidad de los servicios de consejería sobre la alimentación del lactante y niño pequeño en los centros de salud comunitarios en Vietnam**

**Phuing H. Nguyen, Sunny S. Kim, Sarah C. Keithly, Nemat Hajeebhoy, Lan M. Tran, Marie T. Ruel, Rahul Rawat y Purnima Menon**

**Aceptado** 8 de octubre de 2013

## **Antecedentes**

Aunque la franquicia social ha demostrado que mejora la calidad de los servicios de salud reproductiva en los países en desarrollo, su efecto en los servicios de nutrición permanece sin examinar. Este estudio evaluó los efectos de la incorporación de elementos de franquicia social en la configuración de la calidad de la alimentación del lactante y del niño pequeño (ALNP) en las instalaciones y servicios de asesoramiento en Vietnam.

## **Métodos**

Se usaron datos relacionados con el proceso recogidos 12 meses después de la puesta en marcha de las primeras franquicias para comparar aleatoriamente instalaciones de salud soportadas en “Viva y Prospere” (VP-I, n=20), con instalaciones convencionales (IC, n=12) a través de la calidad de

servicio de tres dimensiones: 'estructura' 'proceso' y 'resultado' que capturan la calidad de las instalaciones, la prestación del servicio y las percepciones del cliente y el uso, respectivamente. La recolección de datos incluyó evaluación de las instalaciones (n=32), encuestas de personal (n = 96), observaciones de asesoramiento (n=137) y entrevistas de salida con las madres (n=48).

## **Resultados**

*Estructura:* Las VP-I fueron más propensas a tener una habitación compartida, bien equipada para la nutrición de asesoramiento que las IC (65,0% vs 10,0%). *Proceso:* En comparación con los proveedores de IC, el personal de VP-I tuvo un mejor conocimiento ALNP (puntuación promedio 9,9 vs 8,8, rango 0-11 para la lactancia materna; puntuación promedio 3,6 vs 3,2, rango 0-4 para la alimentación complementaria). Los proveedores de VP-I también demostraron habilidades de comunicación interpersonales significativamente mejores (puntuación 9,6 vs 5,1, rango 0-13) y ofrecieron sesiones de asesoramiento más completas. *Resultado:* La utilización global de las franquicias fue baja (10%). Una mayor proporción de mujeres embarazadas utilizó los servicios de franquicia (48.9%), en comparación con las madres con niños de 6 a 23.9 meses (1.4%). No hubo una diferencia cuantitativa en la satisfacción del cliente con los servicios de asesoramiento entre VP-I e IC, pero los usuarios de la franquicia elogiaron el VP-I por su manera de resolver los problemas relacionados con la alimentación del niño.

## Conclusiones

La incorporación de elementos de franquicia social mejora de manera significativa la calidad de los servicios de asesoramiento de ALNP dentro de las instalaciones de atención primaria de salud del gobierno, en particular sus atributos estructurales y de proceso. A condición de que la utilización del servicio se mejore a través de la generación de demanda, este modelo tiene el potencial de afectar las prácticas de ALNP y de la nutrición infantil.

**Palabras Claves:** franquicia social, asesoramiento sobre nutrición, alimentación del lactante y del niño pequeño, calidad del servicio, Vietnam.

## Mensajes Claves

- La franquicia social se está utilizando cada vez más para mejorar la calidad, la disponibilidad y la utilización de los servicios de salud en todo el mundo, sobre todo para la salud reproductiva en los países en desarrollo. Este es el primer estudio que evalúa el impacto de la franquicia social en la configuración del asesoramiento en la calidad de la alimentación del lactante y del niño pequeño (ALNP).
- La incorporación de elementos de franquicia social en el sistema de salud existente aumenta significativamente los atributos estructurales (por ejemplo, recursos humanos y materiales) y de los procesos (capacidades y prestación de servicios) de la calidad del servicio de asesoramiento de la ALNP. Sin embargo, el aumento de la calidad de la atención también debe

incluir la mejora de los resultados, como las altas tasas de utilización de los servicios, lo que requerirá un mayor esfuerzo en la creación de la demanda.

- La franquicia social ofrece un modelo viable y sostenible, con demostrado potencial para mejorar significativamente la calidad del servicio de asesoramiento de la ALNP.
