# Supplementary material for: Incorporating elements of social franchising in government health services improves the quality of infant and young child feeding counselling services at commune health centres in Vietnam
Source: Oxford University Press journal article supplement (doi:10.1093/heapol/czt083), 2013-11-14
Supplement: czt083_Supplementary_Data.zip [file czt083_Supplementary_Data.zip › Supplementary_Table_1_Selection_Criteria.docx]

**Supplementary Table 1: IYCF Franchisee Selection Criteria**

| 1. **Facility Location** | |
| --- | --- |
| **Necessary Criteria**   - The facility is geographically accessible to target population (i.e. near transportation or within walking distance to large population) - The facility serves high population density (so that its potential for impact is high) - The facility is located in area where there is high unmet need for IYCF services (i.e. birth rate, # women of reproductive age, # pregnant women, # children under age 2, stunting rate, etc.)   IF ALL BOXES ARE TICKED, PROCEED TO NEXT CATEGORY OF CRITERIA | |
| 1. **Facility Sustainability** | |
| **Necessary Criteria**   - For private sector facilities, the facility is ***financially sustainable*** – is already operating without financial difficulties and levels of inputs required to maintain sustainability are minimal - Facility is well managed - Staff have clearly defined roles and responsibilities - Line of authority is clear - There is a clear policy of appraisal and incentive - Staff turnover is low - Any required reports are submitted in timely manner   IF ALL BOXES ARE TICKED, PROCEED TO NEXT CATEGORY OF CRITERIA | |
| 1. **Facility Capacity**   The facility has the capacity to deliver IYCF counseling and support services to the target population  (i.e. has existing good standards of care, adequate staffing and space, and sufficient client flow) | |
| **3.1 Infrastructure** | **Necessary Criteria**   - The facility has running water and electricity - The facility has telephone service - The facility is well ventilated - The facility is well maintained (clean and neat environment) - The facility has space where counseling can be performed in privacy - The facility has a space that could be used for group counseling and/or nutrition classes   **Preferred Criteria**   - The facility has basic cooking facilities (for meal prep classes) - The facility has internet capabilities - The facility has an area that is or could be used as children’s play area while the mother is receiving services |
| **3.2 Equipment** | **Preferred Criteria**  (It is preferable that facilities have this equipment but their lack of it should not exclude them from being considered as the project can help to arrange for procurement of these items if necessary)  The facility has the following equipment:   - Table - Chairs - Lamps - Gas or electric cooker - Cooking equipment (pots, pans, bowls, spoons, etc.) - Growth chart - Height boards - Scale - Ruler - Refrigerator - AV equipment (TV & DVD) - Computer |
| **3.3 Appropriate constellation of services are offered at the facility**  (i.e. other MCH services are already available to some extent) | **Necessary Criteria**   - Facility already provides some services related to maternal and child health   **Preferred Criteria**   - Facility already provides some counseling services, not necessarily IYCF (shows understanding of what counseling entails and makes it easier to incorporate another counseling service) - Facility is already providing some form of IYCF counseling and support (shows that they are already committed to providing the service but just need additional guidance and/or support to do it better or as part of a formal network) |
| **3.4 Facility already meets basic standards of care**  (i.e. conducts itself in accordance with existing national service delivery protocols and standards of care) | **Necessary Criteria**   - Previous monitoring of facility does not reveal any persistent or serious problems related to its service quality   **Preferred Criteria**   - Previous monitoring of facility shows that the facility has consistently received outstanding performance reviews |
| **3.5 Facility has adequate existing client base**  (Facility’s existing client volume is high enough to a) indicate that consumers have access to the facility and are satisfied with at least some of the services currently offered; and b) increase the number of clients that would be exposed to the intervention when seeking out other services.) | **Necessary Criteria**   - The facility has a steady and preferably growing client base (including new and returning clients), particularly related to MCH services |
| **3.6 Facility has capacity to accommodate increased demand for IYCF services** | **Necessary Criteria**   - Facility is willing to dedicate more space and hire additional staff to accommodate increased # of clients seeking out IYCF services if necessary   **Preferred Criteria**   - Facility already has space and staff to accommodate increased # of clients seeking out IYCF services (indicates readiness to start now) |
| **3.7 Clinic is financially accessible to target audience** | **Necessary Criteria**   - Existing fees charged for services are affordable to target audience |
| IF ALL “NECESSARY CRITERIA” BOXES ARE TICKED, PROCEED TO NEXT CATEGORY OF CRITERIA | |
| 1. **Provider Qualifications**   Staff member that has been identified by the facility as the primary provider for the IYCF counseling and support service has appropriate *experience and* *qualifications* | |
| **4.1 Provider has appropriate training** | **Necessary Criteria**   - Provider who will be delivering the IYCF service is formally trained and certified in some aspect of MCH service delivery (midwife, counselor, nurse, or doctor)   **Preferred Criteria**   - In addition to medical training, the provider has received formalized training and certification in: nutrition, general counseling (i.e. not specific to nutrition), or ideally, nutrition counseling |
| **4.2 Provider has good interpersonal communications skills** | **Necessary Criteria**  Provider has some or all of the following characteristics that would make a good counselor:   - Polite - Respectful - Fluent in local language - Good listener - Patient - Friendly - Approachable - Knowledgeable - Persuasive - Enthusiastic - Likes children   **Preferred Criteria**   - Provider has training in counseling and already possesses good counseling skills |
| IF ALL “NECESSARY CRITERIA” BOXES ARE TICKED, PROCEED TO NEXT CATEGORY OF CRITERIA | |
| 1. **Staff Attitudes**   Attitudes of staff members at the facility, particularly the head of the facility, toward delivering IYCF counseling and support services is positive and enthusiastic. | |
| **5.1 Facility has good track record and reputation in community**  (is well respected and trusted) | **Necessary Criteria**   - Facility has high client retention rate (i.e. many return clients as indicated by client records and/or interviews with existing clients and other members of the community) - No serious or persistent complaints have been made about the facility   **Preferred Criteria**   - Facility has been recognized in some way (by community, peers, government) as providing superior services in one way or another. |
| **5.2 Facility has or is willing to establish links with the community** that makes services more accessible to target clients (i.e. via VHWs, referral networks, outreach events, telecounseling, etc.) | **Necessary Criteria**   - Facility staff are willing to conduct outreach activities (e.g. follow-up with clients via telephone or VHWs, etc.) to make the IYCF service more accessible to their clients - Facility is willing to participate in franchise referral network and keep records of referrals in and out.   **Preferred Criteria**   - Facility already conducts community outreach events of some sort - Facility already works with network of Nutrition Collaborators or VHWs of some sort so that they have direct link to clients in their homes. |
| **5.3 Facility staff members are committed to serving their community, motivated to succeed in their practice, personable, and altogether have an attitude that convinces you they’ll be good at this.** | **Necessary Criteria**   - Facility demonstrates some level of creativity in *trying* to improve their services and address health problems in the community (for example, they may have tried new approaches to problem solving – health, management, or otherwise; participated in community events, held health fairs, health talks for the community, etc.)   **Preferred Criteria**   - Facility has visibly apparent programs it has developed to address health problems in the community or improve client satisfaction. |
| IF ALL “NECESSARY CRITERIA” BOXES ARE TICKED, PROCEED TO NEXT CATEGORY OF CRITERIA | |
| 1. **Facilities expressed willingness to develop and adjust to needs of franchise** | |
| **Necessary Criteria**   - Key authority at facility expresses willingness to commit to making provider & facilities available as needed (i.e. assigning at least one qualified staff member who would be dedicated to providing the IYCF service and providing sufficient incentives to retain that provider) and ensures that the provider(s) selected to deliver the service at the facility has the support of his/her supervisors or managers to dedicate time to participate in training workshops and allocate time on the job to delivering the service. - If prospective IYCF service provider does not have counseling skills at present, she/he expresses a willingness to commit the time necessary for training and achieving competency - Provider selected to deliver the service says that he/she is willing to be available to clients by working regular and sufficient hours at the facility where he/she would be offering the service. - Provider selected to deliver the service says that he/she is willing to commit to stay at the facility for an extended period of time (minimum two years?) after having received training and certification from franchisor. - Facility management says that they are willing to maintain client records for the IYCF service and submit reports to franchisor as requested - Facility management says that it is willing to charge a fee for the franchised service (amount to be determined in cooperation with franchisor and local governing authorities).   **Preferred Criteria**   - Clinic already has at least one qualified staff member that could and would be dedicated to providing IYCF counseling and support services | |
