# Supplementary material for: Incorporating elements of social franchising in government health services improves the quality of infant and young child feeding counselling services at commune health centres in Vietnam
Source: Oxford University Press journal article supplement (doi:10.1093/heapol/czt083), 2013-11-14
Supplement: czt083_Supplementary_Data.zip [file czt083_Supplementary_Data.zip › Supplementary_Table_2_Certification_criteria.docx]

Supplementary Table 2: Criteria to certify for franchise at Commune Health Centers

| **Criteria** | **Mean for Verification** | **Avail. Good Cond.** | **Avail. in Broken** | **Not Avail.** |
| --- | --- | --- | --- | --- |
| **Necessary Criteria: It is requested for the Franchise to pass these criteria to get 110 points to be a Standard Franchise** | | **110** | | |
| **I. Status commitment of Franchise** | | **10** | | |
| Letter of Commitment to operate IYCF Social Franchise signed by Head of the Health Facility submitting to Department of Health or District Health Centre | *Commitment Letter* | 10 | 0 | 0 |
| **II. Infrastructure and Equipments** | | **30** | | |
| 1. Mat Troi Be Tho sign board | *Present on road and and/or visible for people from road* | 2 | 0 | 0 |
| 1. Mat Troi Be Tho indoor signage (Outside MTBT room) | *Present outside MTBT room and in good condition* | 2 | 0 | 0 |
| 1. MTBT room was set up properly | *Activities corners were set up properly according to guideline of setting up MTBT room (4 corners- each get 2 points- see principle attached)- if the set up does not follow standard guideline- evaluator should note why is different and ensure the set up follow the key principles as instruction attached) and/or change is acceptable* | 8 | 0 | 0 |
| 1. Wall painted according MTBT standard | *Present in good condition* | 2 | 0 | 0 |
| 1. Mat Troi Be Tho Logo on MTBT painted wall | *Present in good condition* | 2 | 0 | 0 |
| 1. Set of Counseling chairs and table (5 chairs and 1 table) | *Present in good condition* | 2 | 0 | 0 |
| 1. Cooking demonstration table and set of cooking tools (gas cooker, pot, disk…) | *Present in working condition- should have whole set to get point* | 2 | 0 | 0 |
| 1. IEC Materials Holder and Document Drawers | *Present in working condition- should have the MTBT holder and 3 MTBT drawers to get point* | 2 | 0 | 0 |
| 1. Adult Scale | *Present in working condition- test weighing for measurement- allow deficiency of 0.2kg)* | 2 | 0 | 0 |
| 1. Baby Scale | *Present in working condition- test weighing for measurement- allow deficiency of 0.1kg)* | 2 | 0 | 0 |
| 1. Sticker Ruler on MTBT wall | *Sticker Ruler is on MTBT wall* | 2 | 0 | 0 |
| 1. Length Measurement | *Presence in working condition* | 2 | 0 | 0 |
| **III. Human Resources:** This is the core category - Franchise needs to gain maximum points (32) in this category to be certified. | | **32** | | |
| 1. At least 1 staff trained on Management and Operation the IYCF Mat Troi Be Tho Model | *Check training certificate* | 8 | NA | 0 |
| 1. At least 2 staff trained on counseling on IYCF at Health Facility designated as regular counselor at franchise | *Check training certificate (2 staff were trained get 8 points). If there is only 1 staff trained==> get 4 points)* | 8 | NA | 0 |
| 1. The regular counselor could specify clearly 5 packages provided when women in 7th month of pregnancy through the child got 24 months of age | *Q: Please tell us the 5 IYCF counseling packages that provided from 7 months of pregnancy through 24 months of a child?* | 8 | NA | 0 |
| *A: BF promotion; BF support; BF management; CF Education; CF Management (The counselor needs to specify all of 5 packages to get points)* |
| 1. 80% of Community Based Workers of the commune were trained on IYCF for demand creation | *Q: How many Villages were in your commune?* | 8 | NA | 0 |
| *How many Community Based Workers were trained on IYCF to refer clients to Franchise?* |
| **IV. BCC and Monitoring materials** | | **30** | | |
| 1. 2 sets of MTBT counseling card | *Check presence of materials in MTBT room (must have 2 sets to get points- if only 1 set available, get 2 points)* | 4 | 0 | 0 |
| 1. 4 types of MTBT invitation card | *Check presence of materials in MTBT room (should have 4 types to get 4 points- each type get 1 point)* | 4 | 0 | 0 |
| 1. 2 types of MTBT leaflets in places easy accessible with clients. | *Check presence of materials in MTBT room (have 2 types of MTBT leaflets in easy accessible to get 4 points. There are 2 types but inaccessible or if there are only 1 type==> get 2 point)* | 4 | 0 | 0 |
| 1. Mother Child Cards available and used | *Check Mother Child cards (if Cards available and used, get 4 points. If available but not used yet==> 2 points; if not available==>0 point)* | 4 | 0 | 0 |
| 1. Mother and Baby Booklet | *Presence of Booklet in MTBT room* | 4 | 0 | 0 |
| 1. Franchise Monitoring logbook | *Check the book availability* | 4 | 0 | 0 |
| 1. 3 BF posters are on the wall in MTBT room in the right order: Nurse more; No water; No formula | *Check presence of poster in MTBT room (3 posters in right order get 3 points, 3 poster in wrong order get 1 points, if there are only 2 posters or 1 poster or no poster will get 0 point)* | 3 | 0 | 0 |
| 1. 3 BF posters are outside MTBT room in right place (visible for many clients) and in right order: Nurse more, No water, No formula | *Check presence of poster outside MTBT room in place visible for many clients and in the right order (3 posters in right place and right order get 3 points, 3 posters in wrong place and/or wrong order get 1 points, if there are only 2 posters, 1 poster or no poster will get 0 point)* | 3 | 0 | 0 |
| **V. Decree 21** | | 8 | | |
| No observed violations of Decree 21 (no materials or products of formula companies displayed / available at MTBT room) | *Observe the Facility to look for violation: if there is no leaflet about formula or formula company, no promotional items (such as clock, clothes, pen...) with name of formula or formula company==> get points. If there is any violation as mentioned==>0 point.* | 8 | 0 |  |
| **Preferred Criteria: These criteria are preferred for franchise at Commune Health Centre to be an Advanced Franchise.** | | **20** | | |
| 1.    A computer which can access to the Internet at Health Facility | - *Observe the Facility and check with the computer if it can access the internet (if the computer cannot access to internet==>get 0 point)* - *Interview Head of Facility and check paper if available* | 5 | 0 | 0 |
| 2.    A set of TV and DVD available in MTBT room | *Presence in good condition (there should be a set of TV and DVD to get points. If only TV or DVD==> get 0 point)* | 5 | 0 | 0 |
| 3. There is a user fee mechanism set up and operated in the franchise. | *Interview Head of Facility and check paper if available* | 10 | 0 | 0 |
| **Total Score** | | **130** | | |

**Notes to Evaluators:**

- Evaluator will go through every criteria and check properly. If there is any criteria which Franchise does not get maximum points but half of that, Evaluator could write next to the max points.
- Facility must gain the maximum points (30) for Human resource category to be certified
- Facility gained 100 to 110 points will get Franchise Certification (Standard)
- Facility gained 111 to 130 points will get Franchise Certification (Advance)
- Both Standard and Advance Franchises will get the same Certificate but mark in the evaluation sheet for information and later reference.
- After fill in all information in this evaluation sheet, both evaluator and Franchise Manager will sign on this sheet. 1 copy of this will be kept at Franchise to take actions recommended. 1 copy will kept by evaluator to be a supporting document for proposing franchisor to issue certificate

**Result of the Certifying process:**

- Total score gained:
- The Facility can be certified as Mat Troi Be Tho Franchise:

**Standard Franchise**

**Yes**

**No**

**Advance Franchise**

-  Other comments:

| **Evaluator** | **Franchise Manager** |
| --- | --- |
| (signature, full name and job title) | (signature, full name and job title) |
