# Supplementary figures and images for: Incorporating elements of social franchising in government health services improves the quality of infant and young child feeding counselling services at commune health centres in Vietnam
Source: Oxford University Press journal article supplement (doi:10.1093/heapol/czt083), 2013-11-14

**Supplementary Figure 1: Organizational structure of the MTBT franchise model.**

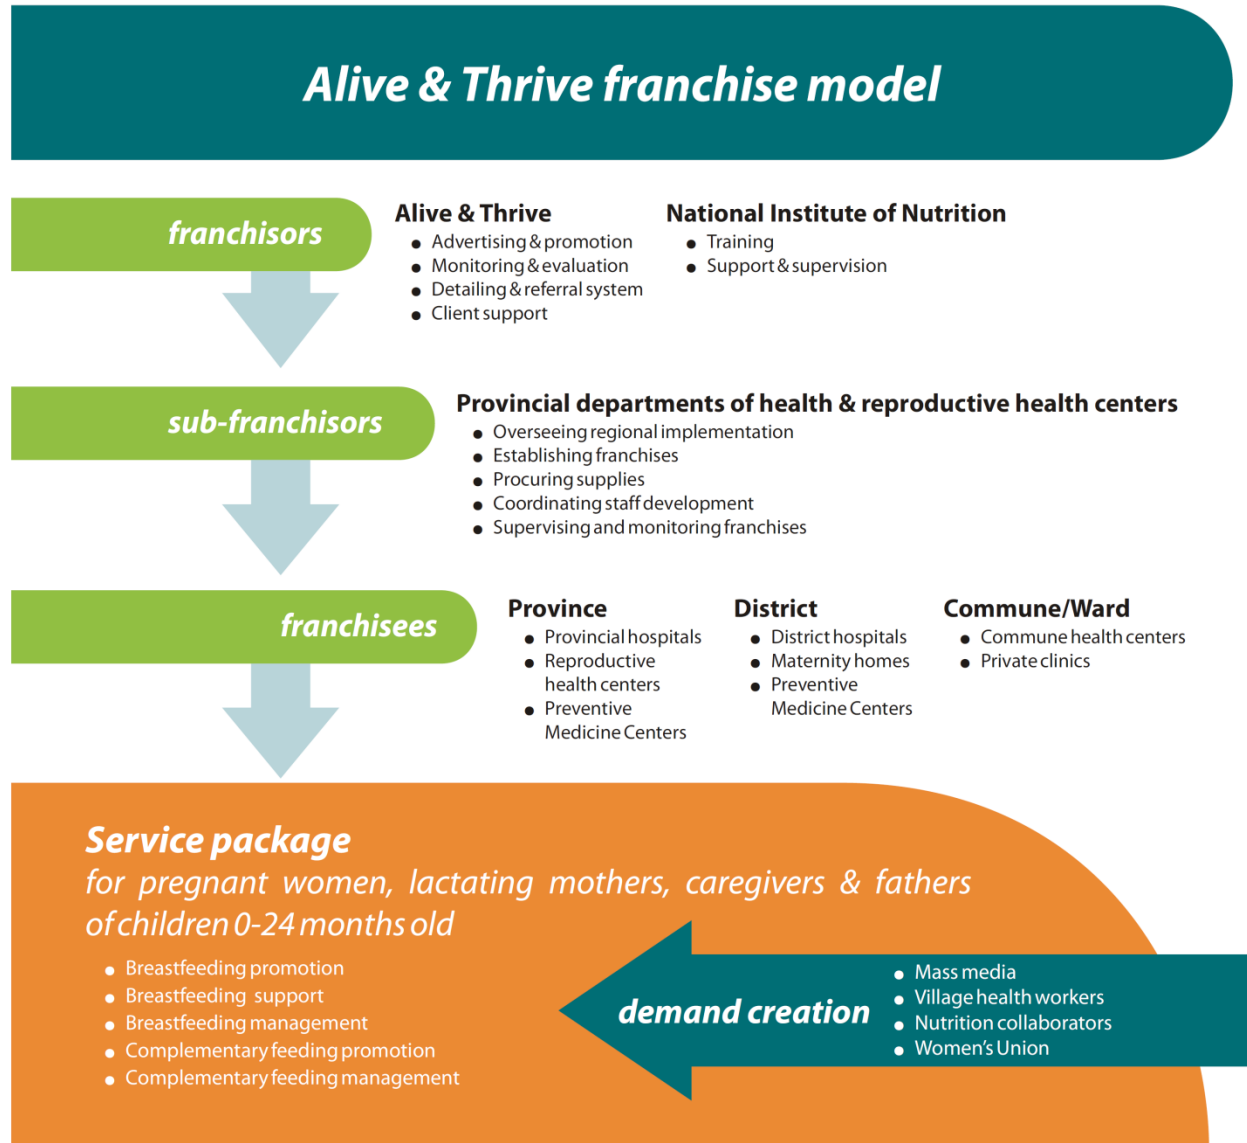

Supplement: czt083_Supplementary_Data.zip [file czt083_Supplementary_Data.zip › Supplementary_Figure_1.pdf]
